# Supplementary material for: Effects of additive manufacturing technology and build angle on surface characteristics and microbial adhesion of 3D-printed dental zirconia: An invitro study
Source: Research Square preprint supplement (doi:10.21203/rs.3.rs-7475480/v1), 2025-09-17
Supplement: Supplementary file 1 [file 2bf246c0a631135226200f2d.docx]

**Table S1. Quantitative evaluation of surface texture parameters from different groups involving height parameters (Sa, Sz, Sp, Sv, Sq, Ssk, Sku), spatial parameters (Sal, Str), hybrid parameters (Spd, Spc), functions and related parameters (Sk, Spk, Svk, Smr1, Smr2, Sxp, Vvv, Vvc, Vmp, Vmc) and feature parameters (Sdq, Sdr). All values are presented as mean ± (standard deviation).**

| **Group** | **Height parameters** | | | | | | |  | **Spacial parameters** | |  | **Hybrid parameters** | |
| --- | --- | --- | --- | --- | --- | --- | --- | --- | --- | --- | --- | --- | --- |
| **Sa**  **(μm)** | **Sz**  **(μm)** | **Sp**  **(μm)** | **Sv**  **(μm)** | **Sq**  **(μm)** | **Ssk** | **Sku** |  | **Sal**  **(μm)** | **Str** |  | **Spd**  **(mm-2)** | **Spc**  **(mm-1)** |
| MJ-0° | 1.45 (0.38) | 10.50 (2.43) | 5.71 (1.42) | 4.78 (1.63) | 1.80 (0.48) | 0.40 (0.55) | 3.15 (0.78) |  | 38.49 (11.65) | 0.38 (0.18) |  | 34822.14 (1664.12) | 264.74 (42.04) |
| MJ-45° | 2.51 (0.47) | 23.72 (4.50) | 11.06 (3.09) | 12.66 (2.49) | 3.19 (0.52) | -0.27 (0.35) | 3.46 (0.85) |  | 19.30 (7.15) | 0.22 (0.12) |  | 33029.65 (2085.95) | 536.77 (55.57) |
| MJ-90° | 1.65 (0.35) | 14.20 (3.47) | 6.98 (3.40) | 7.23 (1.17) | 2.06 (0.39) | -0.13 (0.42) | 3.24 (1.13) |  | 31.05 (10.18) | 0.24 (0.11) |  | 32579.94 (1775.40) | 303.85 (25.22) |
| DLP-0° | 0.16 (0.03) | 2.01 (0.59) | 0.90 (0.40) | 1.11 (0.32) | 0.20 (0.04) | -0.17 (0.18) | 3.78 (0.55) |  | 12.43 (2.80) | 0.79 (0.26) |  | 45652.21 (2462.14) | 111.27 (3.69) |
| DLP-45° | 4.46 (0.24) | 23.17 (2.05) | 10.89 (2.58) | 12.28 (0.88) | 5.23 (0.27) | -0.46 (0.13) | 2.12 (0.16) |  | 17.61 (0.54) | 0.12 (0.01) |  | 27340.36 (2336.83) | 559.75 (51.15) |
| DLP-90° | 0.81 (0.38) | 9.37 (4.16) | 4.47 (2.28) | 4.90 (2.51) | 1.02 (0.48) | -0.28 (0.41) | 3.82 (0.99) |  | 7.30 (1.74) | 0.05 (0.01) |  | 34652.16 (3014.61) | 344.81 (141.00) |
| Milled | 0.24 (0.03) | 3.90 (1.33) | 1.65 (0.34) | 2.26 (1.10) | 0.32 (0.05) | -0.37 (0.61) | 5.53 (2.46) |  | 10.14 (0.79) | 0.30 (0.30) |  | 48681.15 (2839.30) | 178.50 (9.02) |

| **Group** | **Functions and related parameters** | | | | | | | | | |  | **Feature parameters** | |
| --- | --- | --- | --- | --- | --- | --- | --- | --- | --- | --- | --- | --- | --- |
| **Sk**  **(μm)** | **Spk**  **(μm)** | **Svk**  **(μm)** | **Smr1**  **(%)** | **Smr2**  **(%)** | **Sxp**  **(μm)** | **Vvv**  **(ml/ m2)** | **Vvc**  **(ml/ m2)** | **Vmp**  **(ml/ m2)** | **Vmc**  **(ml/ m2)** |  | **Sdq** | **Sdr**  **(%)** |
| MJ-0° | 3.77 (1.49) | 2.22 (1.15) | 1.32 (0.71) | 17.63 (8.17) | 89.86 (4.57) | 3.97 (1.32) | 0.16 (0.08) | 2.41 (0.70) | 0.09 (0.04) | 1.59 (0.49) |  | 0.24 (0.05) | 2.82 (1.08) |
| MJ-45° | 7.72 (1.87) | 2.71 (1.21) | 3.78 (0.90) | 8.69 (1.95) | 87.76 (2.96) | 5.77 (1.47) | 0.41 (0.06) | 3.59 (0.95) | 0.14 (0.05) | 2.82 (0.58) |  | 0.60 (0.10) | 16.13 (4.53) |
| MJ-90° | 4.85 (0.97) | 1.74 (0.63) | 2.32 (0.86) | 10.66 (5.71) | 87.36 (4.54) | 3.67 (0.76) | 0.25 (0.07) | 2.42 (0.59) | 0.08 (0.02) | 1.90 (0.46) |  | 0.28 (0.04) | 3.89 (0.96) |
| DLP-0° | 0.48 (0.06) | 0.20 (0.05) | 0.24 (0.09) | 9.89 (0.67) | 89.32 (0.84) | 0.38 (0.07) | 0.03 (0.01) | 0.23 (0.04) | 0.01 (0.00) | 0.17 (0.02) |  | 0.08 (0.00) | 0.32 (0.03) |
| DLP-45° | 11.98 (2.33) | 0.97 (0.74) | 6.33 (1.64) | 2.09 (0.91) | 77.40 (7.94) | 6.36 (0.99) | 0.54 (0.06) | 5.67 (0.49) | 0.08 (0.02) | 5.78 (0.44) |  | 0.63 (0.03) | 17.43 (1.80) |
| DLP-90° | 2.41 (1.07) | 0.80 (0.35) | 1.27 (0.79) | 6.98 (1.35) | 86.15 (3.03) | 1.58 (0.60) | 0.14 (0.08) | 1.07 (0.46) | 0.04 (0.02) | 0.93 (0.44) |  | 0.33 (0.18) | 5.99 (5.69) |
| Milled | 0.74 (0.07) | 0.31 (0.03) | 0.41 (0.19) | 11.42 (1.09) | 90.61 (1.18) | 0.60 (0.04) | 0.04 (0.01) | 0.37 (0.02) | 0.02 (0.00) | 0.26 (0.02) |  | 0.13 (0.01) | 0.83 (0.17) | |
